# Supplementary material
Source: publisher figshare collection journal article supplement (https://acs.figshare.com/ndownloader/files/5734185)
Supplement: Supplementary file 1 [file 5734185]

*Supplemental Materials for*

# FRET Study of a Trifluorophore-labeled DNAzyme

**Juewen Liu and Yi Lu\***

*Department of Chemistry*

*University of Illinois at Urbana-Champaign*

*601 South Goodwin Avenue*

*Urbana, Illinois 61801, USA*

1. Quenching of FAM fluorescence by protonation.

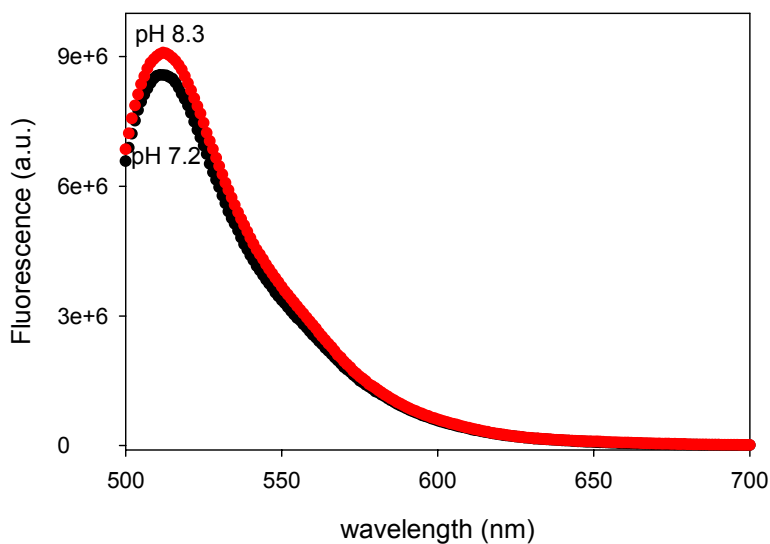

Figure S1. The fluorescence of a 5'-FAM singly-labeled double-stranded DNA at pH 7.2 and pH 8.3 were compared. The buffer was exactly the same as that used in the trifluorophore FRET experiment (50 mM Tris-acetate, 25 mM NaCl). By quantifying the areas under the two curves, relative quantum yield can be acquired. The fluorescence intensity at pH 7.2 was 93.4% of that at pH 8.2.

## 2. Quenching of FAM by $\text{Zn}^{2+}$ .

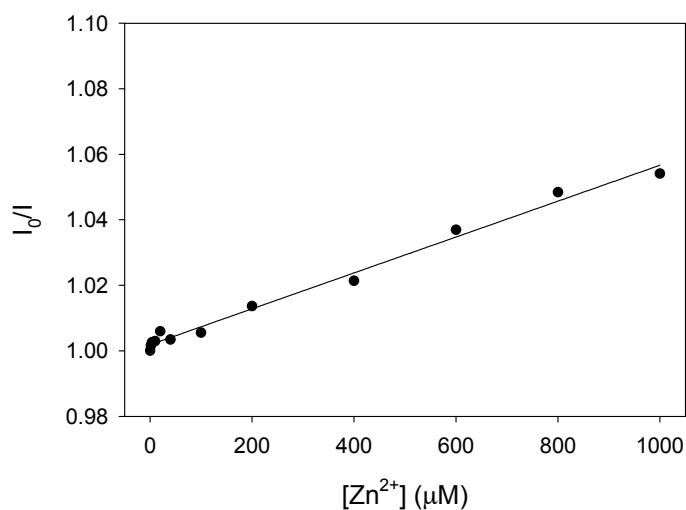

Figure S2. Stern-Volmer plot of a 5'-FAM singly-labeled double-stranded DNA in 50 mM Tris-acetate buffer, pH 7.2, 25 mM NaCl. From the plot, the percentage of quenching in the presence of 1 mM  $\text{Zn}^{2+}$  is about 5%. The data can be fitted linearly ( $R^2=0.99$ ).

## 3. Quench of TMR by $\text{Zn}^{2+}$ .

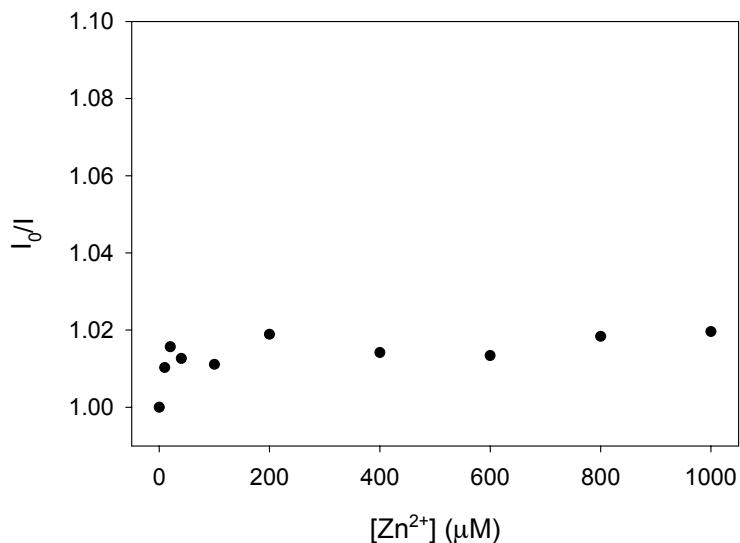

Figure S3. Stern-Volmer plot of a 5'-FAM singly-labeled double-stranded DNA in 50 mM Tris-acetate buffer, pH 7.2, 25 mM NaCl. From the plot, the percentage of quenching in the presence of 1 mM  $\text{Zn}^{2+}$  is less than 2%. The data cannot be fit linearly ( $R^2=0.36$ ).
